# Supplementary material
Source: PubMed Central journal article supplement (PMC5377804)
Supplement: 10.1074_M117.776807_jbc.M117.776807-1.pdf [file 10.1074_M117.776807_jbc.M117.776807-1.pdf]

**Heme assimilation in *Schizosaccharomyces pombe* requires cell surface-anchored protein Shu1 and vacuolar transporter Abc3.**

**Thierry Mourer, Vincent Normant, and Simon Labbé\*.**

Département de Biochimie, Faculté de médecine et des sciences de la santé, Université de Sherbrooke, Sherbrooke, QC, J1E 4K8, Canada.

**TABLE OF CONTENT**

**Figure S1.** *Production of cellular pools of Shu1-HA<sub>4</sub> and Shu1-C72A/C87A/C92A/C101A-HA<sub>4</sub> when their corresponding alleles are expressed under the control of the thiamine-regulatable nmt41x promoter.*

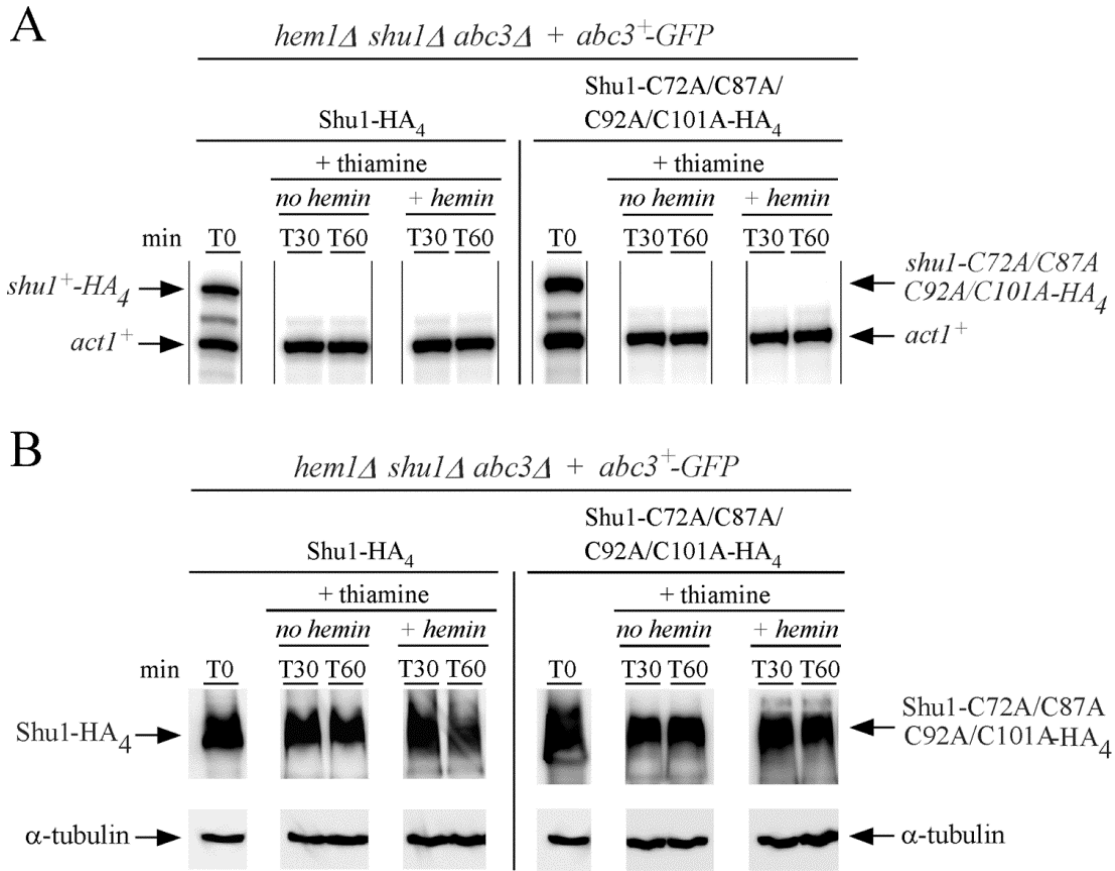

**Fig. S1.** Production of cellular pools of *Shu1-HA<sub>4</sub>* and *Shu1-C72A/C87A/C92A/C101A-HA<sub>4</sub>* when their corresponding alleles are expressed under the control of the thiamine-regulatable *nmt41x* promoter. **A**, Cells harboring *hem1Δ shu1Δ abc3Δ* deletions were co-transformed with pSP1*abc3<sup>+</sup>-GFP* + pBP*nmt41x-shu1<sup>+</sup>-HA<sub>4</sub>* or pSP1*abc3<sup>+</sup>-GFP* + pBP*nmt41x-shu1C72A/C87A/C92A/C101A-HA<sub>4</sub>* plasmids and were grown in thiamine-free medium containing Dip (50  $\mu$ M) for 18 h. Cultures were then transferred to ALA-free and thiamine-replete medium to repress further *Shu1-HA<sub>4</sub>* or *Shu1-C72A/C87A/C92A/C101A-HA<sub>4</sub>* protein synthesis (T0) and grown further in the presence (50  $\mu$ M) or absence of hemin for 30 (T30) and 60 (T60) min. Total RNA was prepared and used in RNase protection assays to determine *shu1<sup>+</sup>-HA<sub>4</sub>*, *shu1C72A/C87A/C92A/C101A-HA<sub>4</sub>* and *act1<sup>+</sup>* mRNA levels. Results are representative of three independent experiments. **B**, Aliquots of the cultures described in panel A were taken at the indicated time points and whole-cell extracts were analyzed by immunoblotting. *Shu1-HA<sub>4</sub>* and *Shu1-C72A/C87A/C92A/C101A-HA<sub>4</sub>* were detected using anti-HA antibody. As an internal control, total extract preparations were probed with anti- $\alpha$ -tubulin antibody.
